# Supplementary material
Source: publisher site journal article supplement (https://www.dovepress.com/get_supplementary_file.php?f=460991.docx)

**Supplementary materials**

Table S1: Patient hospitalized for severe exacerbation of COPD in Bayonne, Bordeaux and Libourne between 1st of January 2017 and 31th of December 2018.

| **Patient characteristics (N=325)** | | |
| --- | --- | --- |
|  | **N** | **%** |
| **Other principal diagnosis** |  |  |
| Acute heart failure | 9 | 2.8 |
| Acute respiratory failure | 18 | 5.5 |
| Pneumonia | 7 | 2.2 |
| Pulmonary embolism | 1 | 0.3 |
| Influenza | 2 | 0.6 |
| Pneumothorax | 2 | 0.6 |
| **Age (years)** |  |  |
| <50 | 8 | 2.5 |
| 50-59 | 61 | 18.8 |
| 60-69 | 112 | 34.5 |
| 70-79 | 98 | 30.2 |
| ≥80 | 46 | 14.2 |
| **Previously undiagnosed COPD** | 78 | 24.0 |
| **Charlson index** |  |  |
| Disease of circulatory system | 130 | 40.0 |
| Diabetes | 62 | 19.1 |
| Cancer | 43 | 13.2 |
| Renal disease | 14 | 4.3 |
| **Socio professional categories*** |  |  |
| Farmers | 9 | 2.8 |
| Craftspersons and shopkeepers | 10 | 3.1 |
| Executives and higher intellectual professions | 24 | 7.4 |
| Intermediate professions | 20 | 6.2 |
| Employees | 52 | 16.0 |
| Workers | 79 | 24.3 |
| Others | 5 | 1.5 |

**Missing data : n=124 (38.2%)*

Table S2 : Characteristics of patient hospitalized for severe acute exacerbation between 1st January 2017and 31th of December 2018 in each center : Bordeaux, Bayonne and Libourne

| **Patient characteristics** | **Bordeaux (N=95)** | | **Bayonne (N=123)** | | **Libourne (N=107)** | |
| --- | --- | --- | --- | --- | --- | --- |
|  | **N** | **%** | **N** | **%** | **N** | **%** |
| **Gender** |  |  |  |  |  |  |
| Male | 59 | 62.1 | 64 | 52.0 | 71 | 66.4 |
| **Age (years)** |  |  |  |  |  |  |
| Mean +/- SD | 66 +/- 9.8 | | 69 +/- 10.0 | | 68 +/- 9.0 | |
| **Charlson index** |  |  |  |  |  |  |
| Mean +/- SD | 2.4 +/- 2.0 | | 2.5 +/- 2.0 | | 2.0 +/- 1.5 | |
| **Oxygenotherapy** | 36 | 37.9 | 38 | 30.9 | 24 | 22.4 |
| **NIV** | 19 | 20.0 | 22 | 17.9 | 11 | 10.3 |
| **Baseline treatment** |  |  |  |  |  |  |
| No treatment | 15 | 15.8 | 16 | 13.0 | 14 | 13.1 |
| LABA or LAMA alone | 8 | 8.4 | 7 | 5.7 | 7 | 6.5 |
| LABA + LAMA | 23 | 24.2 | 43 | 35.0 | 42 | 39.3 |
| LABA + ICS | 18 | 18.9 | 12 | 9.8 | 14 | 13.1 |
| LABA + LAMA + ICS | 29 | 30.5 | 43 | 35.0 | 30 | 28.0 |
| **Flu vaccination** | 32 | 33.7 | 35 | 28.5 | 28 | 26.2 |
| **Pneumococcal vaccination** | 25 | 26.3 | 36 | 29.3 | 16 | 15.0 |
| **Pulmonary functional tests (mean +/- SD)** |  |  |  |  |  |  |
| FEV1 (%) | 43.2 +/- 17.2 | | 45.6 +/- 17.2 | | 44.4 +/- 13.8 | |
| TLC (%) | 108.9 +/- 23.6 | | 109.5 +/- 30.0 | | 113.4 +/- 24.0 | |
| **GOLD stage** |  |  |  |  |  |  |
| 1 | 1 | 1.1 | 4 | 3.3 | 1 | 0.9 |
| 2 | 34 | 35.8 | 44 | 35.8 | 34 | 31.8 |
| 3 | 35 | 36.8 | 47 | 38.2 | 57 | 53.3 |
| 4 | 23 | 24.2 | 25 | 20.3 | 15 | 14.0 |
| **Frequent exacerbator** | 12 | 12.6 | 8 | 6.5 | 4 | 3.7 |
| **Smoking** |  |  |  |  |  |  |
| Never smokers | 0 | 0.0 | 1 | 0.8 | 5 | 4.7 |
| Former smokers (> 3months) | 54 | 56.8 | 57 | 46.3 | 46 | 43.0 |
| Current smokers | 41 | 43.2 | 61 | 49.6 | 55 | 51.4 |
| **Previous pulmonary rehabilitation** | 27 | 28.4 | 46 | 37.4 | 18 | 16.8 |
| **Number of patients rehospitalized at 12 months for COPD** | 10 | 10.5 | 28 | 22.8 | 15 | 14.0 |
| **Death 12 months after discharge** | 3 | 3.2 | 10 | 8.1 | 2 | 1.9 |

(NIV = non invasive ventilation, LABA = long acting beta agonist, LAMA = long acting muscarinic antagonist, ICS = inhaled corticosteroid, FEV1 = forced expiratory volume in 1 second, TLC = total lung capacity)

Table S3: Features related to pulmonary rehabilitation

| **Patients admitted to pulmonary rehabilitation** | | | |
| --- | --- | --- | --- |
|  | **N** | | **%** |
| **Delay between discharge and PR (days)** |  | |  |
| < 7  7 – 30  30 – 90 | 69 | 75.0 | |
| 10 | 10.8 | |
| 8 | 8.7 | |
| **Distance between home and PR (kilometers)** |  | |  |
| Median [Q1; Q3] | 33.5 [20.1 ; 49.8] | | |

*Q1-Q3 = first and third quartile*

(PR= pulmonary rehabilitation)

Table S4 : Comparison of patients undergoing pulmonary rehabilitation or not, after severe acute exacerbation, in Bordeaux, Bayonne and Libourne.

|  | **Pulmonary rehabilitation** | | **No pulmonary rehabilitation** | | **p-value** |
| --- | --- | --- | --- | --- | --- |
|  | **N** | **%** | **N** | **%** |  |
| **Age (years)** |  |  |  |  |  |
| <50 | 3 | 3.3 | 5 | 2.2 | 0.69 |
| 50-59 | 14 | 15.2 | 47 | 20.1 | 0.30 |
| 60-69 | 28 | 34.2 | 84 | 36.1 | 0.33 |
| 70-79 | 32 | 34.8 | 66 | 28.3 | 0.25 |
| ≥80 | 15 | 16.3 | 31 | 13.3 | 0.48 |
| **Charlson index** |  |  |  |  |  |
| Previous COPD | 73 | 79.4 | 174 | 74.7 | 0.37 |
| Disease of circulatory system | 34 | 36.9 | 96 | 41.2 | 0.48 |
| Diabetes | 13 | 14.1 | 50 | 21.5 | 0.13 |
| Cancer | 8 | 8.7 | 35 | 15.0 | 0.13 |
| Renal disease | 4 | 4.35 | 13 | 5.6 | 0.79 |
| **Length of stay (days)** |  |  |  |  |  |
| Mean +/- SD  Socio professional categories* | 10.7 +/- 12.6 | | 7.9 +/- 5.7 | | 0.0479 |
| Farmers | 1 | 1.1 | 8 | 3.4 | 0.45 |
| Craftspersons and shopkeepers | 2 | 2.2 | 8 | 3.4 | 0.73 |
| Executives and higher intellectual professions | 6 | 6.5 | 18 | 7.7 | 0.82 |
| Intermediate professions | 6 | 6.5 | 14 | 6.0 | 0.80 |
| Employees | 17 | 18.5 | 35 | 15.0 | 0.50 |
| Workers | 23 | 25.0 | 56 | 24.0 | 0.89 |
| Others | 0 | 0.0 | 5 | 2.2 | 0.33 |

**Missing data : n=36 (39.1%) in pulmonary rehabilitation group, n=88 (37.8%) in no pulmonary rehabilitation group*,

Figure S1 : Survival probability at 12 months according to PR uptake and after adjustment on age, FEV1 and Charlson comorbidity index. (FEV1 = forced expiratory volume in 1 second, PR = pulmonary rehabilitation)


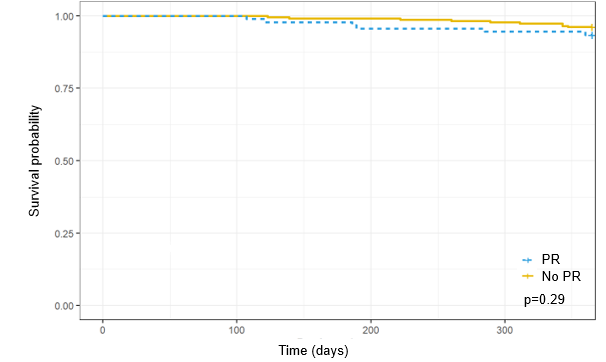

Supplement: Supplementary file 1 [file get_supplementary_file.php]
